# Supplementary material for: Impact of Erythritol and Xylitol on Glucose Metabolism and Gut Microbiota in Obese Individuals: A Randomized Controlled Trial
Source: Research Square preprint supplement (doi:10.21203/rs.3.rs-6301313/v1), 2025-07-25
Supplement: Supplementary file 1 [file ad2e18e563065927d7c7e378.docx]

***Overview Tables and Figures***

SUPPLEMENTARY MATERIAL

Table S1. Dietary patterns (number of servings during 7 days)

Table S2. Gastrointestinal symptoms (GSRS) and stool form and consistency (Bristol Stool Scale; BSS) before and 7 weeks after sweetener intake

Table S3. Baseline characteristic of volunteers stratified by pre-diabetic status

Table S4. Sweetener effect on glycaemic-related parameters before and 7 weeks after sweetener intake in prediabetic and normoglycaemic subjects

Table S5. O-PLS models showing the effect of covariates on: A) the plasma metabolome, B) the urinary metabolome, C) on gut microbiota composition before treatment

Figure S1. Flow Diagram

Figure S2. Effect of covariate adjustment on correlation between the metabolome and the gut microbiota with plasma fructosamine

Figure S3. Metabolome and gut microbiota profiles in response to sweetener intake

Figure S4. Differences in the effect of 7-week consumption of erythritol and xylitol on glycaemic parameters in participants stratified by pre-diabetic status

# SUPPLEMENTARY MATERIAL

# Table S1: Dietary patterns (number of servings during 7 days)

| **Food category** | Before treatment | Week 3 | After 7 weeks | Before vs. 7 weeks (P-value) |
| --- | --- | --- | --- | --- |
| **Vegetables** |  |  |  |  |
| Control | 9.1 ± 3.4 | 9.7 ± 6.6 | 8.3 ± 3.9 | NS |
| Erythritol | 8.3 ± 4.4 | 8.3 ± 4.8 | 9.2 ± 5.0 | NS |
| Xylitol | 10.1 ± 4.8 | 9.5 ± 5.0 | 8.5 ± 5.8 | NS |
| Between treatments P-value | NS | NA | NS |  |
| **Fruits** | |  |  |  |
| Control | 8.9 ± 5.4 | 6.8 ± 6.6 | 5.1 ± 7.0 | P = 0.003 |
| Erythritol | 9.2 ± 6.1 | 9.5 ± 6.4 | 6.8 ± 4.7 | P = 0.054 |
| Xylitol | 7.5 ± 5.9 | 5.6 ± 4.4 | 4.4 ± 3.2 | P = 0.027 |
| Between treatments P-value | NS | NA | NS |  |
| **Cereals** | |  |  |  |
| Control | 13.9 ± 9.9 | 13.0 ± 7.0 | 13.3 ± 7.9 | NS |
| Erythritol | 18.3 ± 16.4 | 15.0 ± 9.6 | 13.8 ± 8.7 | NS |
| Xylitol | 22.3 ± 15.4 | 20.1 ± 13.2 | 17.0 ± 9.9 | NS |
| Between treatments P-value | Control vs. Erythritol:  P = 0.072 | NA | NS |  |
| **Carbohydrates** | |  |  |  |
| Control | 9.1 ± 4.9 | 8.1 ± 3.3 | 7.0 ± 1.9 | NS |
| Erythritol | 9.1 ± 4.8 | 7.4 ± 3.3 | 7.8 ± 2.6 | NS |
| Xylitol | 9.6 ± 3.8 | 7.7 ± 2.7 | 8.7 ± 4.7 | NS |
| Between treatments P-value | NS | NA | NS |  |
| **Meat / Fish** | |  |  |  |
| Control | 14.4 ± 5.5 | 12.6 ± 5.1 | 14.7 ± 5.4 | NS |
| Erythritol | 16.0 ± 8.4 | 15.1 ± 6.7 | 13.6 ± 5.6 | NS |
| Xylitol | 16.6 ± 6.0 | 13.9 ± 5.8 | 14.2 ± 7.0 | NS |
| Between treatments P-value | NS | NA | NS |  |
| **Milk** | |  |  |  |
| Control | 11.3 ± 5.2 | 8.8 ± 3.5 | 9.6 ± 4.9 | NS |
| Erythritol | 15.5 ± 8.6 | 12.5 ± 7.5 | 12.3 ± 6.7 | NS |
| Xylitol | 14.8 ± 5.5 | 13.0 ± 8.5 | 12.4 ± 8.1 | NS |
| Between treatments P-value | NS | NA | NS |  |
| **Fat** | |  |  |  |
| Control | 3.4 ± 1.9 | 3.4 ± 2.9 | 3.8 ± 2.6 | NS |
| Erythritol | 8.6 ± 6.0 | 5.6 ± 5.3 | 5.7 ± 4.1 | P = 0.047 |
| Xylitol | 6.1 ± 4.4 | 4.8 ± 4.1 | 6.1 ± 4.9 | NS |
| Between treatments P-value | Control vs. Erythritol  P = 0.0005 | NA | NS |  |
| **Beverages with added sugar** |  |  |  |  |
| Control | 7.1 ± 10.2 | 5.9 ± 9.4 | 5.0 ± 7.0 | NS |
| Erythritol | 5.7 ± 9.5 | 2.5 ± 5.5 | 2.0 ± 7.3 | P = 0.061 |
| Xylitol | 6.7 ± 7.6 | 3.1 ± 5.7 | 3.6 ± 8.1 | NS |
| Between treatments P-value | NS | NA | NS |  |
| **Beverages with sweeteners** |  |  |  |  |
| Control | 0.3 ± 1.1 | 0.3 ± 1.2 | 0.3 ± 1.4 | NS |
| Erythritol | 0.7 ± 2.1 | 1.8 ± 5.5 | 0.7 ± 2.0 | NS |
| Xylitol | 1.4 ± 5.1 | 2.1 ± 5.9 | 1.4 ± 4.6 | NS |
| Between treatments P-value | NS | NA | NS |  |
| **Sugar-sweetened beverages** |  |  |  |  |
| Control | 4.9 ± 8.1 | 4.4 ± 8.6 | 1.7 ± 2.4 | NS |
| Erythritol | 4.5 ± 8.4 | 3.9 ± 6.4 | 3.9 ± 6.3 | NS |
| Xylitol | 6.0 ± 9.9 | 3.7 ± 6.8 | 3.9 ± 5.7 | NS |
| Between treatments P-value | NS | NA | NS |  |
| **Sweets** |  |  |  |  |
| Control | 8.9 ± 5.5 | 7.3 ± 5.0 | 7.8 ± 7.1 | NS |
| Erythritol | 10.8 ± 8.1 | 7.4 ± 7.9 | 8.6 ± 6.6 | NS |
| Xylitol | 12.7 ± 5.7 | 9.9 ± 4.5 | 9.9 ± 5.9 | NS |
| Between treatments P-value | NS | NA | NS |  |

**Table S1: Dietary patterns before and 7 weeks after sweetener intake**

NS = non-significant. NA = Not applicable. Level of significance alpha = 0.05. Linear mixed effect models with Šidak post-hoc test; **Beverages with added sugar:** e.g., coffee sweetened with sugar; **Beverages with sweeteners:** e.g., soft drink with low-caloric sweetener; **Sugar-sweetened beverages:** soft drink containing sugar.

**Table S2**: Gastrointestinal symptoms (GSRS) and stool form and consistency (Bristol Stool Scale; BSS) before and 7 weeks after sweetener intake

| Parameter | Before treatment | Week 3 | After 7 weeks | Before vs. 7 weeks (P-value) |
| --- | --- | --- | --- | --- |
| **Total Score** |  |  |  |  |
| Control | 21.34 ± 6.79 | 23.18 ± 9.91 | 22.77 ± 8.49 | NS |
| Erythritol | 21.11 ± 5.08 | 28.92 ± 12.39 | 24.02 ± 6.81 | P = 0.081 |
| Xylitol | 24.70 ± 8.99 | 25.45 ± 10.12 | 28.53 ± 10.82 | NS |
| Between treatments P-value | NS | NA | Control vs. Xylitol: P = 0.082 |  |
| **Pain** | |  |  |  |
| Control | 1.41 ± 0.66 | 1.44 ± 0.67 | 1.33 ± 0.47 | NS |
| Erythritol | 1.44 ± 0.75 | 1.78 ± 1.03 | 1.59 ± 0.70 | NS |
| Xylitol | 1.62 ± 0.77 | 1.77 ± 0.96 | 1.62 ± 0.64 | NS |
| Between treatments P-value | NS | NA | NS |  |
| **Reflux** | |  |  |  |
| Control | 1.31 ± 0.56 | 1.41 ± 0.59 | 1.23 ± 0.43 | NS |
| Erythritol | 1.25 ± 0.53 | 1.75 ± 1.05 | 1.43 ± 0.85 | P = 0.031 |
| Xylitol | 1.43 ± 0.61 | 1.34 ± 0.64 | 1.75 ± 1.12 | NS |
| Between treatments P-value | NS | NA | Control vs. Xylitol: P = 0.038 |  |
| **Indigestion** | |  |  |  |
| Control | 1.81 ± 0.82 | 1.85 ± 1.05 | 1.74 ± 0.86 | NS |
| Erythritol | 1.74 ± 0.55 | 2.25 ± 1.29 | 1.77 ± 0.76 | NS |
| Xylitol | 1.98 ± 0.96 | 1.97 ± 0.94 | 2.20 ± 1.06 | NS |
| Between treatments P-value | NS | NA | NS |  |
| **Diarrhea** | |  |  |  |
| Control | 1.35 ± 0.60 | 1.45 ± 1.28 | 1.33 ± 0.54 | NS |
| Erythritol | 1.27 ± 0.41 | 2.37 ± 1.69 | 1.67 ± 1.08 | P = 0.070 |
| Xylitol | 1.52 ± 0.75 | 2.00 ± 1.81 | 2.02 ± 1.21 | P = 0.070 |
| Between treatments P-value | NS | NA | Control vs. Xylitol: P = 0.023 |  |
| **Constipation** | |  |  |  |
| Control | 1.37 ± 0. 66 | 1.42 ± 0.97 | 1.79 ± 1.57 | NS |
| Erythritol | 1.17 ± 0.45 | 1.32 ± 0.73 | 1.43 ± 0.71 | NS |
| Xylitol | 1.52 ± 0.66 | 1.20 ± 0.39 | 1.78 ± 1.59 | NS |
| Between treatments P-value | NS | NA | NS |  |
| **BSS (Bristol Stool Scale)** | |  |  |  |
| Control | 3.5 ± 1.1 | - | 3.8 ± 1.2 | NS |
| Erythritol | 4.3 ± 1.5 | - | 4.0 ± 1.4 | NS |
| Xylitol | 3.8 ± 1.1 | - | 3.9 ± 1.4 | NS |
| Between treatments P-value | NS | - | NS |  |

**Table S2: Gastrointestinal symptoms (GSRS) and stool form and consistency (Bristol Stool Scale; BSS) before and 7 weeks after sweetener intake**

Control: n= 22; Xylitol: n= 20; Erythritol: n= 22. GSRS “Pain”: mean from questions Q1, Q4, Q5; “Reflux”: mean from questions: Q2, Q3; “Indigestion”: mean from questions: Q6, Q7, Q8, Q9; “Diarrhea”: mean from questions: Q11, Q12, Q14; “Constipation”: mean from questions: Q10, Q13, Q15. NS = non-significant. NA = Not applicable. Level of significance alpha = 0.05. Linear mixed effect models with Šidak post-hoc test;

**Table S3.** Baseline characteristic of volunteers stratified by pre-diabetic status

| Parameter | Control  (N = 21) | Erythritol  (N = 21) | Xylitol  (N=18) | p-value |
| --- | --- | --- | --- | --- |
| Prediabetes (n; %) | 14/21 (66.7) | 11/21 (52.4) | 11/18 (61.1) |  |
| Sex (f; %) | 16/21 (71.4) | 15/21(71.4) | 10/18 (55.6) | NS |
| Normoglycemic | 5/7 (71.4) | 7/10 (70) | 6/7 (85.7) | NS |
| Prediabetic | 11/14 (78.5) | 8/11 (72.7) | 4/11 (36.3) | NS |
| Age (years) | 35.9 ± 1.7 | 33.5 ± 2.0 | 32.1 ± 2.3 | NS |
| Normoglycemic | 30 ± 7.8 | 33.2 ± 8.6 | 29 ± 9.2 | NS |
| Prediabetic | 38.6 ± 6.3 | 33.2 ± 10.1 | 34.1 ± 9.6 | NS |
| Height (m) | 1.66 ± 0.08 | 1.69 ± 0.08 | 1.73 ± 0.11 | NS |
| Normoglycemic | 1.69 ± 0.08 | 1.66 ± 0.09 | 1.71 ± 0.11 | NS |
| Prediabetic | 1.65 ± 0.08 | 1.70 ± 0.07 | 1.74 ± 0.11 | **0.04** |
| Weight (kg) | 104.3 ± 19.7 | 110.4 ± 25.4 | 115.0 ± 22.8 | NS |
| Normoglycemic | 103.9 ± 15.80 | 106.5 ± 11.42 | 109.1 ± 20.99 | NS |
| Prediabetic | 104.5 ± 21.99 | 113.9 ± 18.09 | 118.8 ± 24.08 | NS |
| BMI (kg/m2) | 37.5 ± 5.8 | 38.9 ± 4.7 | 38.3 ± 5,7 | NS |
| Normoglycemic | 36.5 ± 4.8 | 38.7 ± 4.4 | 37.0 ± 4.2 | NS |
| Prediabetic | 38.0 ± 6.3 | 39.0 ± 5.3 | 39.0 ± 6.5 | NS |
| Abd. circumference (cm) | 117.2 ± 16.8 | 122.0 ± 11.3 | 120.6 ± 15.6 | NS |
| Normoglycemic | 115.1 ± 18.0 | 116.62 ± 9.6 | 113.6 ± 14.7 | NS |
| Prediabetic | 118.3 ± 16.9 | 126.0 ± 10.7 | 125.0 ± 15.1 | NS |
| Systolic BP (mmHg) | 123.7 ± 13.5 | 122.2 ± 16.3 | 129.1 ± 12.4 | NS |
| Normoglycemic | 120.6 ± 16.97 | 118.1 ± 8.45 | 127.4 ± 14.79 | NS |
| Prediabetic | 125.2 ± 11.84 | 126 ± 20.91 | 130.2 ± 11.35 | NS |
| Diastolic BP (mmHg) | 83.7 ± 13.2 | 82.2 ± 11.4 | 81.8 ± 9.71 | NS |
| Normoglycemic | 81.6 ± 13.1 | 79.2 ± 6.8 | 81.1 ± 9.71 | NS |
| Prediabetic | 84.7 ± 13.4 | 85.0 ± 14.2 | 82.3 ± 10.2 | NS |
| Heart rate (beats/min) | 76.4 ± 7.0 | 74.0 ± 7.8 | 74.0 ± 10.1 | NS |
| Normoglycemic | 78 ± 10.7 | 73.9 ± 8.1 | 76 ± 7.7 | NS |
| Prediabetic | 75.6 ± 4.5 | 74.0 ± 7.9 | 72.7 ± 11.5 | NS |
| HbA1c (%) | 5.4 ± 0.3 | 5.4 ± 0.4 | 5.5 ± 0.4 | NS |
| Normoglycemic | 5.36 ± 0.4 | 5.31 ± 0.4 | 5.31± 0.4 | NS |
| Prediabetic | 5.45 ± 0.2 | 5.49 ± 0.4 | 5.55 ± 0.4 | NS |
| Fasting Glucose (mmol/L) | 5.8 ± 0.7 | 5.7 ± 0.6 | 5.6 ± 0.4 | NS |
| Normoglycemic | 5.2 ± 0.2 | 5.2 ± 0.2 | 5.2 ± 0.3 | NS |
| Prediabetic | 6.1 ± 0.7 | 6.1 ± 0.5 | 5.8 ± 0.1 | NS |
| Fasting Insulin (mIU/L) | 19.5 ± 12.7 | 18.0 ± 9.9 | 22.0 ± 10.7 | NS |
| Normoglycemic | 13.3 ± 7.06 | 15.8 ± 9.68 | 17.9 ± 9.35 | NS |
| Prediabetic | 22.7 ± 13.93 | 20.0 ± 10.17 | 24.6 ± 11.10 | NS |
| Tobacco consumption (cigarettes/d) | 1.7 ± 3.2 | 3.3 ± 6.1 | 6.3 ± 11.1 | NS |
| Normoglycemic | 2.1 ± 3.9 | 3.7 ± 5.6 | 2.0 ± 2.7 | NS |
| Prediabetic | 1.5 ± 3.0 | 3.0 ± 6.8 | 9.1 ± 13.6 | **0.02** |
| Pack-years | 1.6 ± 5.5 | 0.6 ± 1.7 | 4.8 ± 9.8 | NS |
| Normoglycemic | 0.6 ± 1.0 | 0.7 ± 1.5 | 0.2 ± 0.4 | NS |
| Prediabetic | 2.2 ± 6.9 | 0.6 ± 1.9 | 7.1 ± 11.5 | NS |
| Alcohol (units/d) | 0.2 ± 0.34 | 0.2 ± 0.33 | 0.4 ± 0.58 | NS |
| Normoglycemic | 0.2 ± 0.4 | 0.31 ± 0.5 | 0.40 ± 0.9 | NS |
| Prediabetic | 0.1 ± 0.3 | 0.068 ± 0.2 | 0.320 ± 0.4 | NS |

BMI: Body Mass Index; BP: Blood pressure; HbA1C: percentage glycated hemoglobin.

**Table S4.** Sweetener effect on glycaemic-related parameters before and 7 weeks after sweetener intake in prediabetic and normoglycaemic subjects

|  | At baseline | | | |
| --- | --- | --- | --- | --- |
|  | Prediabetic | | Normoglycaemic | |
|  | p | pFDR | p | pFDR |
| HOMA-IR Index | 0.685 | 0.947 | 0.608 | 0.880 |
| Fructosamine (umol/mL) | 0.994 | 0.994 | 0.108 | 0.323 |
| oGTT: Glucose AUC 0-120min | 0.441 | 0.947 | 0.575 | 0.880 |
| oGTT: Glucose AUC 30-120min | 0.592 | 0.947 | 0.880 | 0.880 |
| oGTT: Insulin AUC 0-120min | 0.352 | 0.947 | 0.862 | 0.880 |
| oGTT: Insulin AUC 30-120min | 0.790 | 0.947 | 0.102 | 0.323 |
|  | **7 weeks post-treatment** | | | |
|  | Pre-diabetic | | Normoglycaemic | |
|  | p | pFDR | p | pFDR |
| HOMA-IR Index | 0.084 | 0.168 | 0.192 | 0.576 |
| Fructosamine (umol/mL) | 0.020 | **0.072** | 0.054 | 0.323 |
| oGTT: Glucose AUC 0-120min | 0.755 | 0.755 | 0.433 | 0.650 |
| oGTT: Glucose AUC 30-120min | 0.024 | **0.072** | 0.298 | 0.596 |
| oGTT: Insulin AUC 0-120min | 0.253 | 0.380 | 0.982 | 0.982 |
| oGTT: Insulin AUC 30-120min | 0.385 | 0.462 | 0.672 | 0.807 |

**Table S5.** O-PLS models showing the effect of covariates on the A) plasma metabolome, B) urinary metabolome, and C) gut microbiota composition before treatment.

1. **Plasma Metabolome**

|  | HPOS | | | Lipids RPC | | |
| --- | --- | --- | --- | --- | --- | --- |
|  | R2Y | Q2Y | pQ2Y | R2Y | Q2Y | pQ2Y |
| Age | 0.428 | 0.012 | 0.088 | 0.298 | -0.197 | 0.532 |
| Sex | 0.743 | 0.247 | **0.002** | 0.316 | 0.0801 | **0.035** |
| Country | 0.567 | 0.240 | **0.001** | 0.544 | 0.356 | **0.001** |
| Prediabetic status | 0.399 | -0.059 | 0.188 | 0.271 | -0.216 | 0.581 |

1. **Urinary Metabolome**

|  | HPOS | | | RPC | | |
| --- | --- | --- | --- | --- | --- | --- |
|  | R2Y | Q2Y | pQ2Y | R2Y | Q2Y | pQ2Y |
| Age | 0.438 | 0.044 | **0.04** | 0.609 | 0.336 | **0.001** |
| Sex | 0.393 | 0.049 | **0.029** | 0.718 | 0.415 | **0.001** |
| Country | 0.544 | 0.100 | **0.006** | 0.590 | 0.084 | **0.002** |
| Prediabetic status | 0.494 | -0.099 | 0.272 | 0.494 | -0.099 | 0.260 |

1. **Gut Microbiota Composition**

|  | Phylum | | | Family | | | Genus | | |
| --- | --- | --- | --- | --- | --- | --- | --- | --- | --- |
|  | R2Y | Q2Y | pQ2Y | R2Y | Q2Y | pQ2Y | R2Y | Q2Y | pQ2Y |
| Age | 0.057 | -0.068 | 0.474 | 0.217 | -0.015 | 0.164 | 0.400 | 0.036 | 0.056 |
| Sex | 0.084 | -0.206 | 0.943 | 0.24 | -0.056 | 0.284 | 0.338 | -0.162 | 0.471 |
| Country | 0.168 | -0.097 | 0.364 | 0.372 | 0.036 | **0.008** | 0.479 | 0.024 | 0.052 |
| Prediabetic status | 0.048 | -0.112 | 0.659 | 0.313 | -0.183 | 0.586 | 0.515 | -0.167 | 0.482 |

**Figure S1:** Flow Diagram

**n= 68 randomized**

**Erythritol**

**Xylitol**

**Control**

**23** Allocated to intervention

**23** Received allocated intervention

**0** Did not receive allocated intervention

**21** Allocated to intervention

**21** Received allocated intervention

**0** Did not receive allocated intervention

**24** Allocated to intervention

**24** Received allocated intervention

**0** Did not receive allocated intervention

**At 7 weeks post-treatment**

**2** Drop-out (2 received antibiotics), 1 freezer breakdown

**22** Final analysis

(**21** complete set of all parameters)

**At 7 weeks post-treatment**

**1** Drop-out (1 received antibiotics), 1 freezer breakdown

**22** Final analysis

(**21** complete set of all parameters)

**At 7 weeks post-treatment**

**1** Drop-out (1 hemolysis), 2 freezer breakdown

**20** Final analysis

(**18** complete set of all parameters)

**Figure S2.** Effect of covariate adjustment on correlation between the metabolome and the gut microbiota with plasma fructosamine


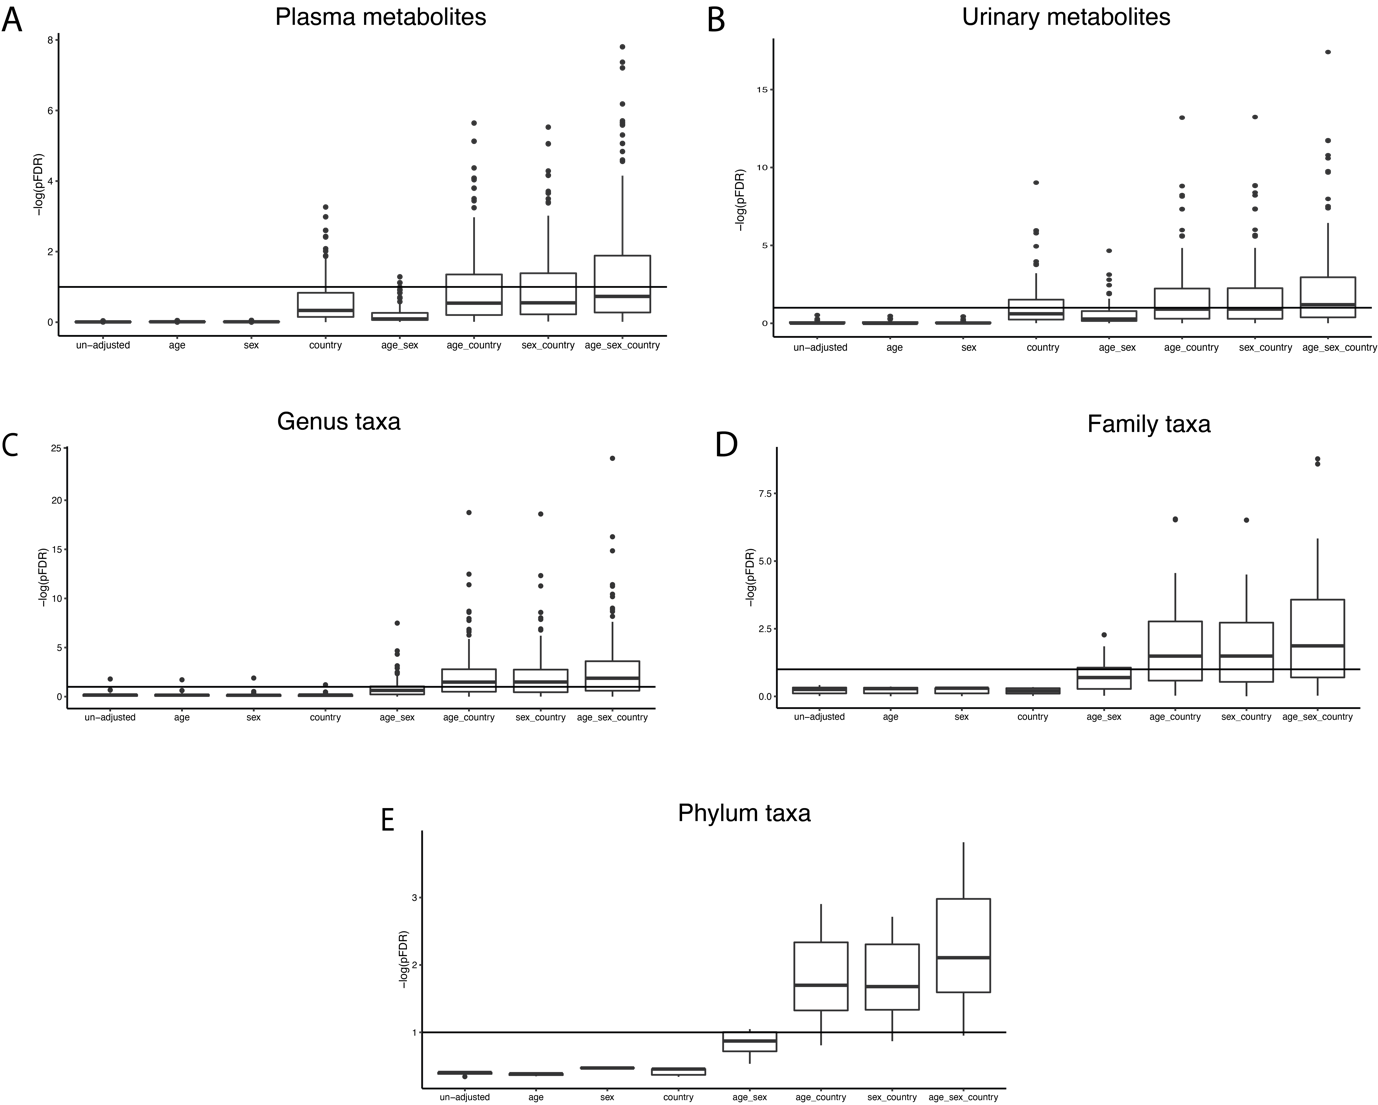
**Figure S2*.* Effect of covariate adjustment on correlations between the metabolome and the gut microbiota with plasma fructosamine**

Partial Spearman’s correlation between plasma fructosamine and **A)** plasma metabolome*,* **B)** urinary metabolome, **C)** gut microbiota at the genus level*,* **D)** gut microbiota at the family level*,* and **E)** gut microbiota at the phylum level. The x-axis represents the model covariate tested*,* and the y-axis the significant -log(pvalue) following adjustment by FDR. The line represents the cut-off for pFDR <0.1

**Figure S3**. Metabolome and gut microbiota profiles in response to sweetener intake
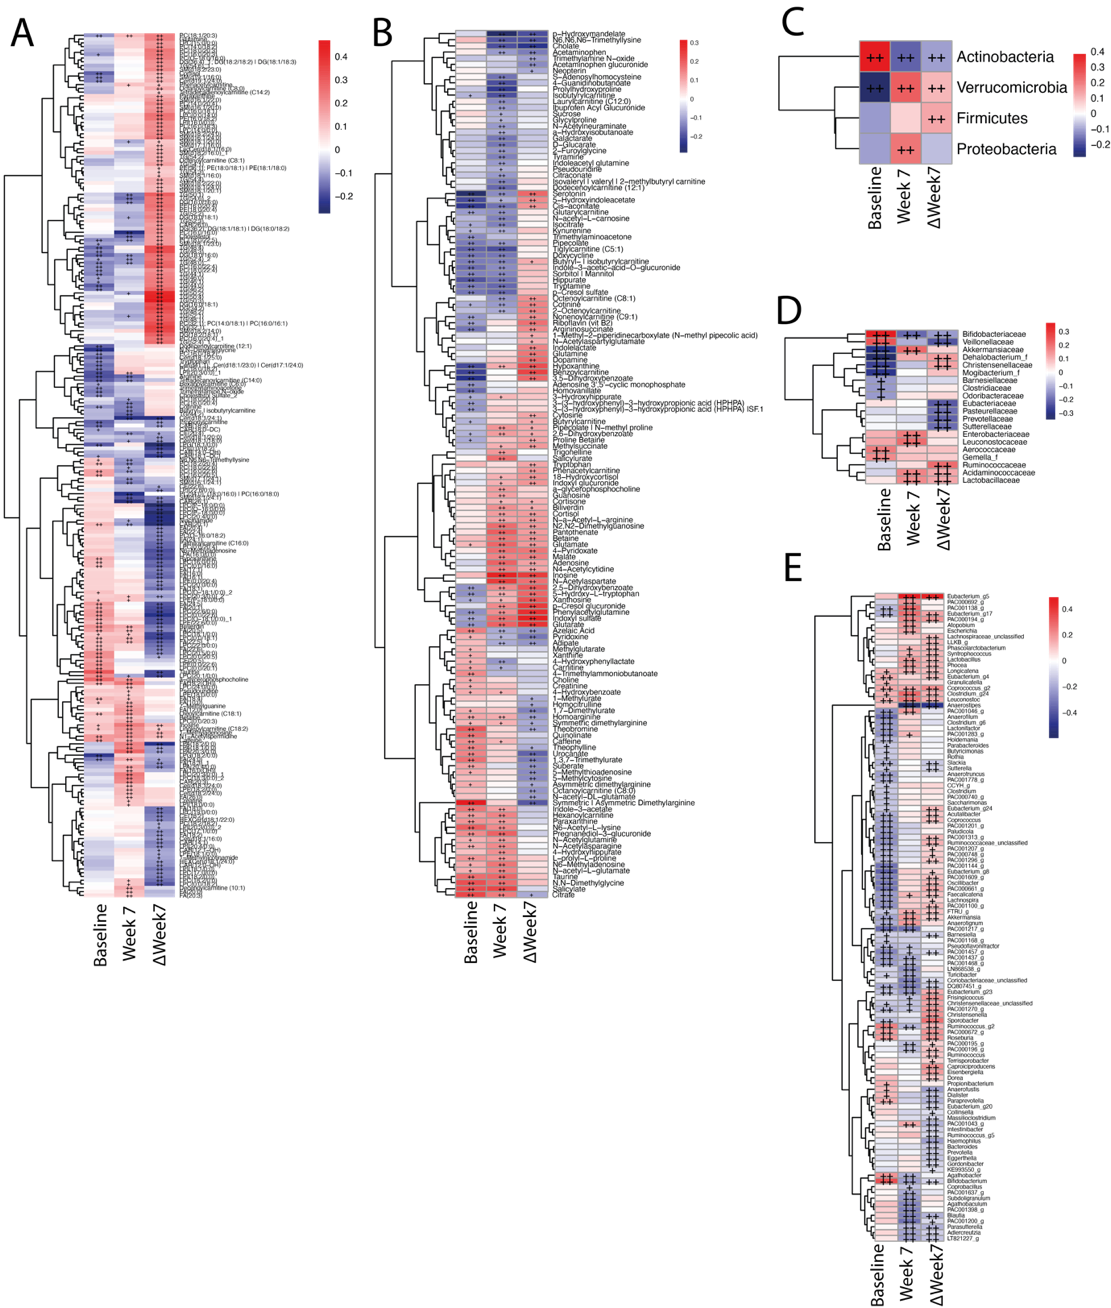


**Figure S3. Metabolome and gut microbiota profiles in response to sweetener intake**

Heatmaps showing the significant features at pFDR < 0.1 of partial Mann-Kendall trend tests (trend order tested xylitol -> control -> erythritol ) adjusted by age, sex, and country at baseline, 7-week post-treatment and on the individualized response to sweetener intake for **A**) plasma metabolome features, **B**) urinary metabolome features, **C**) gut microbiota taxa at the phylum level, **D**) gut microbiota taxa at the family level, and **E**) gut microbiota taxa at the genus level.

**Figure S4. Differences in the effect of 7-week consumption of erythritol and xylitol on glycaemic parameters in participants stratified by pre-diabetic status**

***
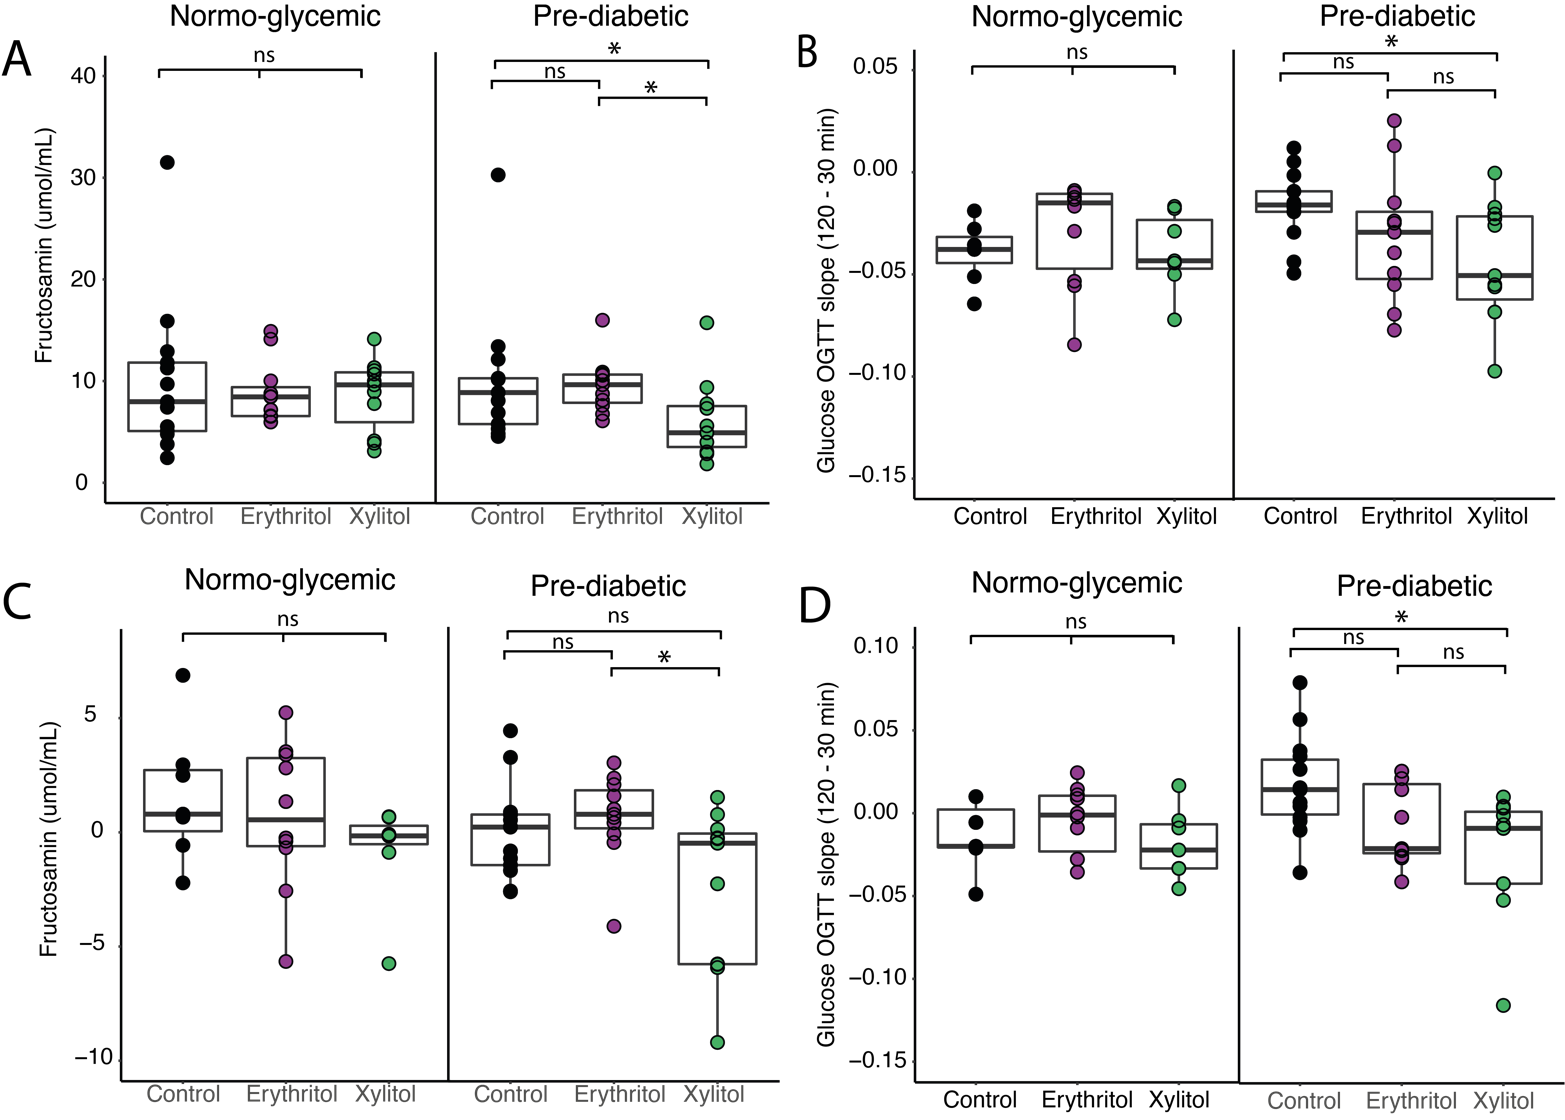
***

**Figure S4. Differences in the effect of 7-week consumption of erythritol and xylitol on glycaemic parameters in participants stratified by pre-diabetic status**

**A)** Plasma fructosamine levels in normoglycaemic (NG) and pre-diabetic (PD) participants at 7 weeks post-treatment, showing a significant reduction in the PD group for the xylitol group compared to the erythritol and control group. **B)** oGTT slope in NG and PD participants at 7 weeks post-treatment, showing a significant reduction in plasma glucose at the 120-minute time-point from the 30-minute time-point of the oGTT test in the xylitol group compared to the control group of the PD participants. **C)** Personalized response at 7 weeks post-treatment to plasma fructosamine levels in NG and PD participants, showing a significant reduction in the xylitol group compared to the erythritol group. **D)** Personalized response to the oGTT test at 7 weeks post-treatment in NG and PD participants, showing a significant reduction in plasma glucose at the 120-minute time-point from the 30-minute time-point of the oGTT test in the xylitol group compared to the control group of the PD participants.Kruskal-Wallis test with Dunn’s post-hoc analysis for multiple comparisons. * pFDR <0.05; *** pFDR <0.001
